# Supplementary material for: Quantifying the photocatalytic role and activity at the edge and surface of Pd co-catalysts using N2 fixation as a case
Source: Royal Society of Chemistry journal article supplement (doi:10.1039/d1ta07899b), 2021-01-01
Supplement: d1ta07899b1.pdf [file d1ta07899b1.pdf]

*Electronic Supplementary Material (ESI)*

**Quantifying the photocatalytic role and activity at the edge  
and surface of Pd co-catalysts using N<sub>2</sub> fixation as a case**

Shijie Wu,<sup>‡a</sup> Jiafei Zhang,<sup>‡a,b</sup> Wenbin Chen,<sup>a</sup> Pingxing Xing,<sup>a</sup> Xingchen  
Liu,<sup>c</sup> Botao Teng,<sup>\*a,b</sup> Leihong Zhao,<sup>\*a</sup> and Song Bai<sup>\*a</sup>

<sup>a</sup> Key Laboratory of the Ministry of Education for Advanced Catalysis Materials,  
College of Chemistry and Life Sciences, Zhejiang Normal University, Jinhua, 321004,  
China.

<sup>b</sup> Tianjin Key Laboratory of Brine Chemical Engineering and Resource Eco-  
utilization, College of Chemical Engineering and Materials Science, Tianjin  
University of Science and Technology, Tianjin, 300457, China.

<sup>c</sup> State Key Laboratory of Coal Conversion, Institute of Coal Chemistry, Chinese  
Academy of Sciences, Taiyuan, 030001, China.

E-mail: [tbt@zjnu.cn](mailto:tbt@zjnu.cn); [zhaoleihong@163.com](mailto:zhaoleihong@163.com); [songbai@zjnu.edu.cn](mailto:songbai@zjnu.edu.cn)

## **Additional experimental**

### **Chemicals**

$\text{K}_2\text{PdCl}_4$  (98%), Palladium chloride ( $\text{PdCl}_2$ ), palladium (II) acetylacetonate ( $\text{Pd}(\text{acac})_2$ , 99%), iron (II) acetylacetonate ( $\text{Fe}(\text{acac})_2$ , 98%) were all purchased from Sigma-Aladdin. Poly(vinyl pyrrolidone) (PVP, M.W.  $\approx$  55000 and M.W.  $\approx$  8000) were all purchased from Aldrich. Polyallylamine hydrochloride (PAH, M.W.  $\approx$  1,5000) was purchased from Energy Chemical. All other chemicals were of analytical grade and purchased from Sinopharm Chemical Reagent Co. Ltd. (Shanghai, China). All the chemicals were used as received without further purification. The water used in all experiments was deionized water prepared by passing through an ultra-pure purification system.

### **Synthesis of $\text{TiO}_2$ nanosheets**

$\text{TiO}_2$  nanosheets were synthesized by modifying a method in the literature with hydrofluoric acid as a capping agent.<sup>S1</sup> In a typical experimental procedure, 10 mL of tetrabutyl titanate ( $\text{Ti}(\text{OBu})_4$ ) and 2.5 mL of hydrofluoric acid (HF) were mixed in a 50 mL Teflon-lined autoclave with under magnetic stirring. Then 0.5 mL trifluoroacetic acid (TFA) was dropped into the Teflon-lined stainless autoclave, which was heated at 200 °C for 24 h. After naturally cooling down to room temperature, the precipitate was collected by centrifuging the suspension, washed with water thoroughly, and then dried at 50 °C in a vacuum. Caution! HF is extremely corrosive and toxic, and should be handled with extreme care.

### **Catalyst characterizations**

Transmission electron microscopy (TEM) and high-resolution TEM (HRTEM) images were taken on a JEOL JEM-2100F field-emission high-resolution transmission electron microscope operated at 200 kV. Powder X-ray powder diffraction (XRD) patterns were collected on a D8 Advance X-ray diffractometer with Non-monochromated  $\text{Cu-K}\alpha$  X-Ray. X-ray photoelectron spectra (XPS) were

collected on an ESCALab 250 X-ray photoelectron spectrometer, using nonmonochromatized Al-K $\alpha$  X-ray as the excitation source. UV-vis-NIR diffuse reflectance data were recorded in the spectral region of 200-800 nm with a Shimadzu SolidSpec-3700 spectrophotometer. Photoluminescence (PL) spectra were recorded on a HITACHIF-7000 Spectrofluorometer with an excitation wavelength of 315 nm. The Brunauer-Emmett-Teller (BET) surface area and N<sub>2</sub> adsorption were tested using a Quantachrome autosorb iQ analyzer at 77 and 273 K, respectively. N<sub>2</sub>-TPD profiles were recorded by a catalyst analyzer BELCAT II. <sup>1</sup>H-NMR spectra were obtained with a Bruker Avance 600WB nuclear magnetic resonance spectrometer (298 K, 600 MHz).

### **Photocatalytic N<sub>2</sub> fixation measurements**

The photocatalytic activities of the synthesized TiO<sub>2</sub>-Pd were evaluated by photocatalytic dinitrogen fixation under UV light. The photocatalytic N<sub>2</sub> fixation experiments were carried out in N<sub>2</sub> atmosphere at room temperature. Before UV light irradiation, 0.1 g of solid catalyst was added into a 200 mL ethanol solution (containing 10 mL ethanol and 190 mL water) and stirred for 1 h in the dark to ensure an adsorption-desorption equilibrium. UV light (320 <  $\lambda$  < 420 nm) was used as the illumination source, which was realized in the presence of a short-wave-pass 420 nm cutoff filter. The power density of UV light was measured to be 150 mW cm<sup>-2</sup>. At every 1 h interval of irradiation, 6 mL of suspension was collected and centrifuged to obtain liquid samples. NH<sub>4</sub><sup>+</sup> concentration analysis was conducted using Nessler's reagent method, at  $\lambda$  = 420 nm in a UV-vis spectrophotometer.

### **Photoelectrochemical measurements**

4.0 mg of as-synthesized products were dispersed in a mixture of 10  $\mu$ L ethanol and 10  $\mu$ L Nafion, which were then uniformly spin-dropped onto at a 1 cm  $\times$  1 cm indium tin oxide (ITO)-coated glass by a spin coater (SC-1B, China). Subsequently, the ITO-coated glasses were heated at 80  $^{\circ}$ C in a vacuum oven for 1 h. The photocurrents were measured on a CHI 760E electrochemical station (Shanghai

Chenhua, China) in ambient conditions under irradiation of a 300 W Xe lamp (PLS-SXE300/300UV, Beijing Perfectlight, China). UV light ( $320 < \lambda < 420$  nm) was used as the illumination source, which was realized in the presence of a short-wave-pass 420 nm cutoff filter. The power density of UV light was measured to be  $150 \text{ mW cm}^{-2}$ . A three-electrode cell was used to perform the electrochemical measurements. The working electrode was the ITO-coated glass. An Ag/AgCl electrode and Pt foil were used as the reference electrode and counter electrode, respectively. The three electrodes were inserted in a quartz cell filled with Ar-saturated and  $\text{N}_2$ -saturated  $0.5 \text{ M Na}_2\text{SO}_4$  electrolyte, respectively. The photoresponse of the prepared photoelectrodes (i.e., I-t) was obtained by measuring the photocurrent density under chopped light irradiation (light on/off cycles: 60 s) at a bias potential of  $0.4 \text{ V vs. Ag/AgCl}$  for 600 s.

### TOF calculation methods

Since the surface area of  $\text{TiO}_2$  and  $\text{TiO}_2$ -Pd is similar, it is reasonably supposed that the difference of photocatalytic performance is due to the change of the sizes of Pd nanoparticles. Hence the activities of Pd cocatalysts were obtained by subtracting the value of  $\text{TiO}_2$  ( $46.5 \mu\text{mol g}_{\text{cat}}^{-1} \text{ h}^{-1}$ ), as shown in the following equation.

$$r_{Pd} = r_{\text{TiO}_2\text{-Pd}} - r_{\text{TiO}_2}$$

Then the TOF of Pd cocatalyst was calculated as:  $TOF_{Pd} = r_{Pd}/N_{Pd}$

Where  $N_{Pd}$  is the number Pd atom at the edge and surface of Pd nanoparticle.

Since the activity of Pd cocatalyst is contributed by the edge and surface, the TOF on Pd nanoparticles with the same surface area and different edge-to-surface atomic ratio can be calculated as follows:

$$TOF_{Pd} = TOF_{Pd\text{-edge}} \times ratio_{Pd\text{-edge}} + TOF_{Pd\text{-surface}} \times ratio_{Pd\text{-surface}}$$

Where  $TOF_{Pd\text{-edge}}$  and  $TOF_{Pd\text{-surface}}$  are the turnover frequencies of Pd atom at the edge and surface, respectively, and their values should be larger than 0;  $ratio_{Pd\text{-edge}}$  and  $ratio_{Pd\text{-surface}}$  are the ratios of Pd atom at the edge and surface, respectively, and their values are listed in Table S1. Then  $TOF_{Pd\text{-edge}}$  and  $TOF_{Pd\text{-surface}}$  were calculated by

solving the equations above.

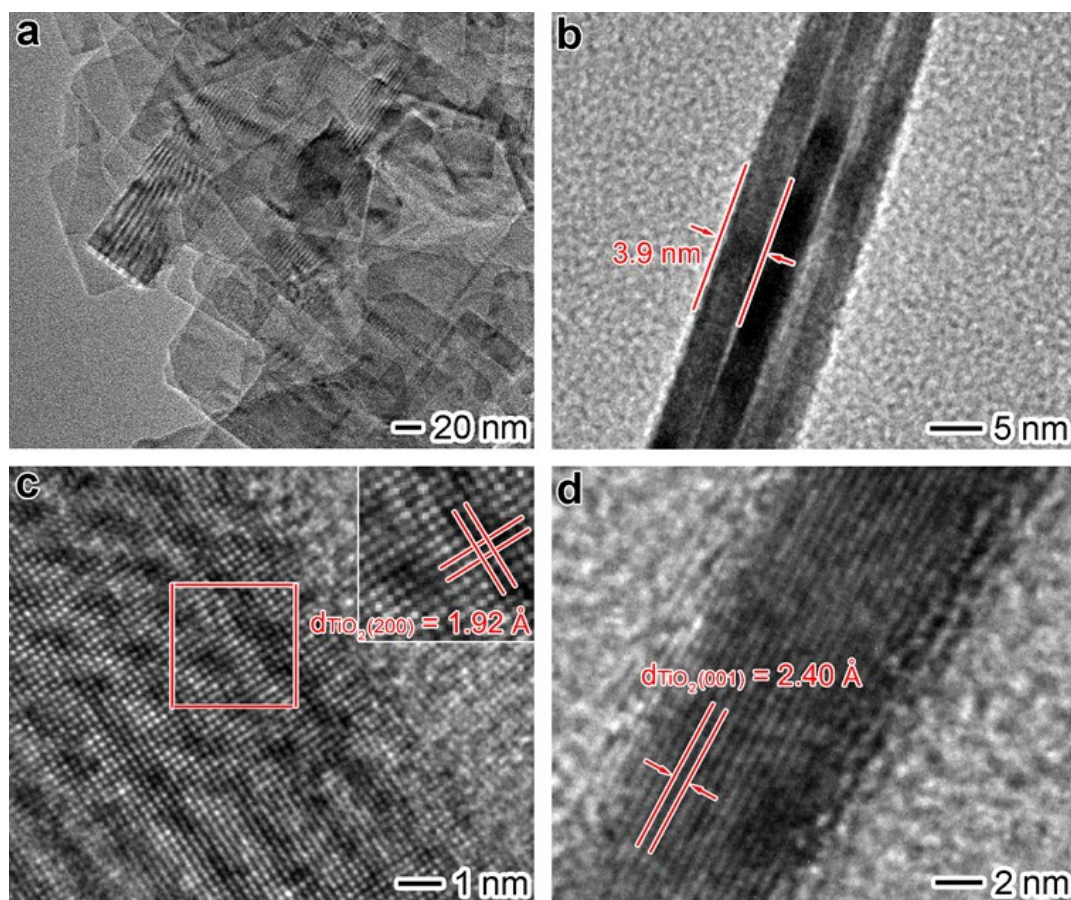

**Fig. S1** TEM and HRTEM images of TiO<sub>2</sub> nanosheets: (a) TEM image showing the flat surface of nanosheets; (b) TEM image showing the cross section and thickness of a nanosheet; (c) HRTEM image taken from a flat face of nanosheet; (d) HRTEM image taken from a cross section of nanosheet.

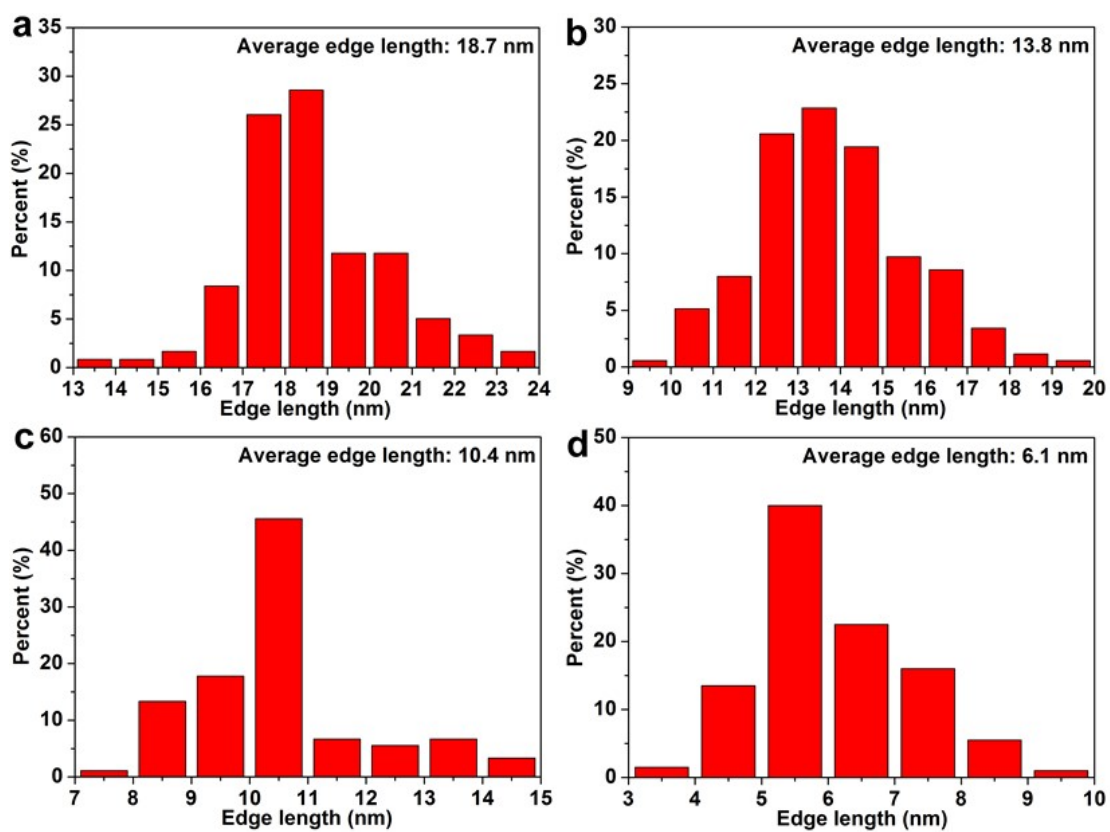

**Fig. S2** Average edge length of Pd nanocubes in (a)  $\text{TiO}_2\text{-Pd}_{\text{cub}-19}$ , (b)  $\text{TiO}_2\text{-Pd}_{\text{cub}-14}$ , (c)  $\text{TiO}_2\text{-Pd}_{\text{cub}-10}$  and (d)  $\text{TiO}_2\text{-Pd}_{\text{cub}-6}$ .

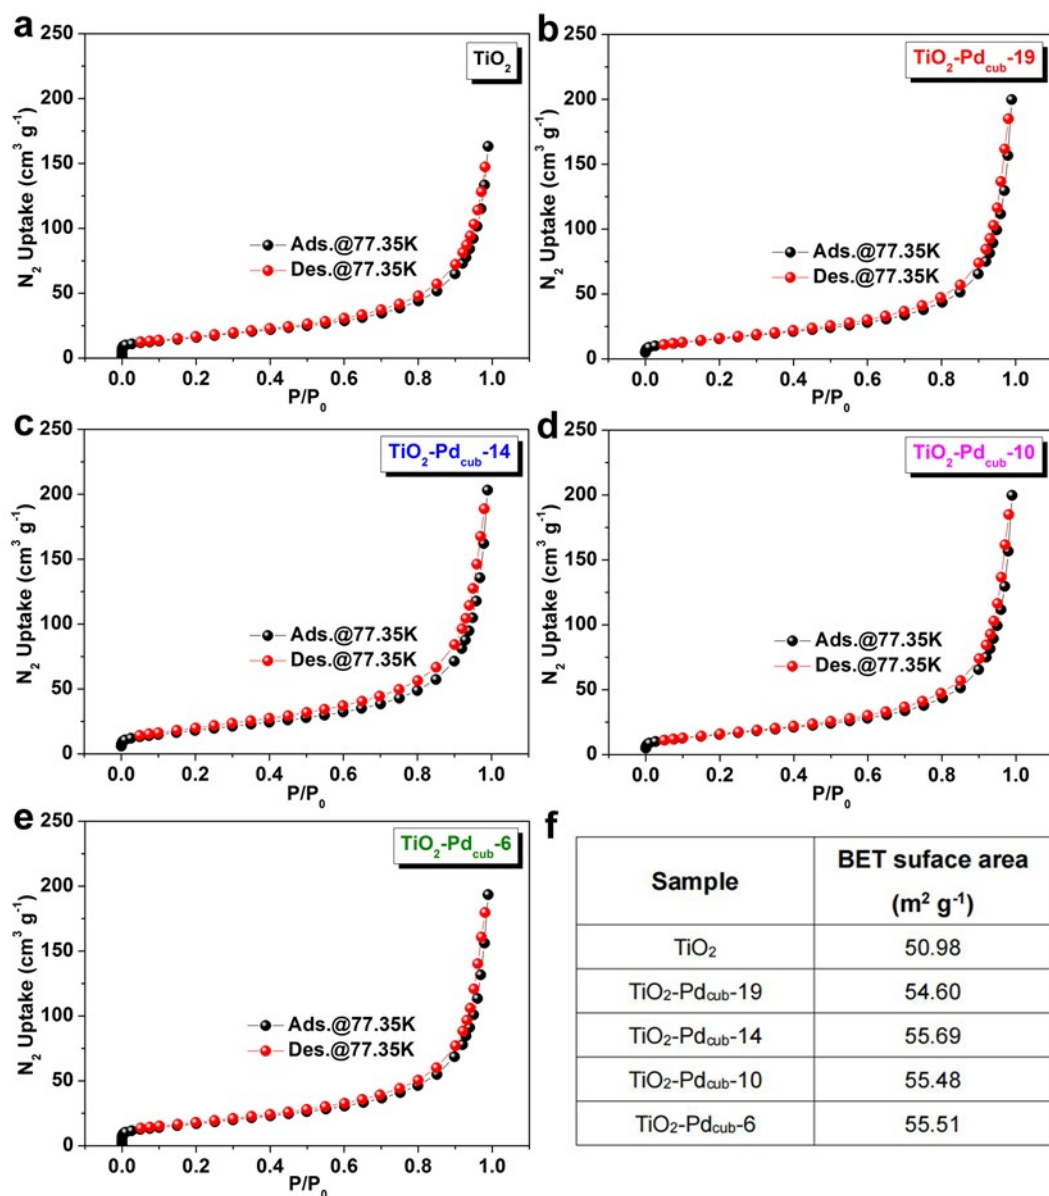

**Fig. S3** Nitrogen adsorption- desorption isotherms for (a) TiO<sub>2</sub>, (b) TiO<sub>2</sub>-Pd<sub>cub</sub>-19, (c) TiO<sub>2</sub>-Pd<sub>cub</sub>-14, (d) TiO<sub>2</sub>-Pd<sub>cub</sub>-10 and (e) TiO<sub>2</sub>-Pd<sub>cub</sub>-6 at 77.35 K, respectively. (f) calculated BET surface area of the samples.

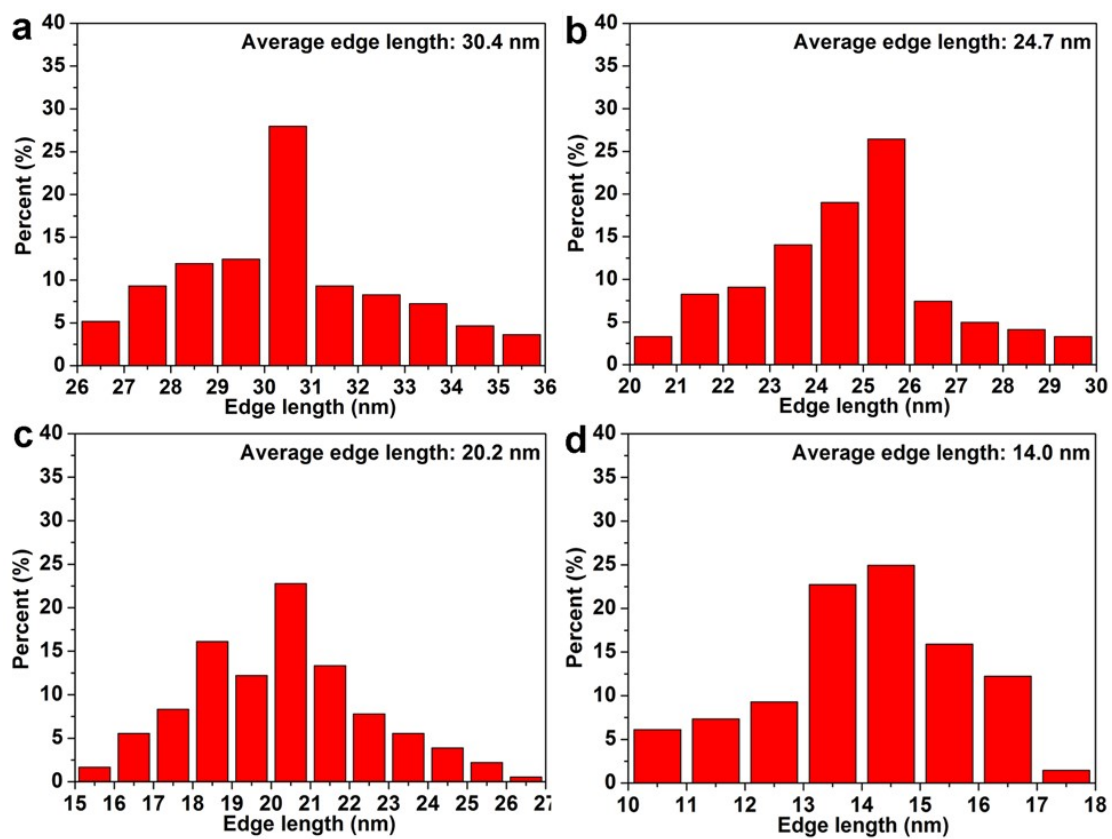

**Fig. S4** Average edge length of Pd nanotetrahedrons in (a)  $\text{TiO}_2\text{-Pd}_{\text{tet-30}}$ , (b)  $\text{TiO}_2\text{-Pd}_{\text{tet-25}}$ , (c)  $\text{TiO}_2\text{-Pd}_{\text{tet-20}}$  and (d)  $\text{TiO}_2\text{-Pd}_{\text{tet-14}}$ .



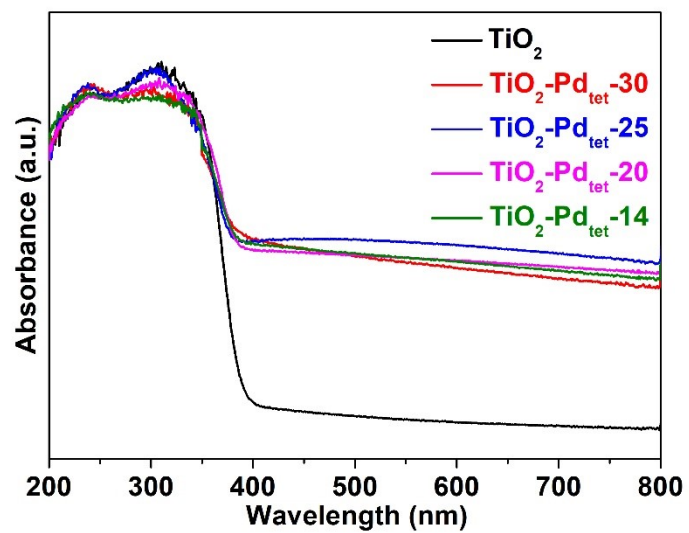

**Fig. S5** UV-vis diffuse reflectance spectra of  $\text{TiO}_2\text{-Pd}_{\text{tet}}$  samples with blank  $\text{TiO}_2$  as a reference.

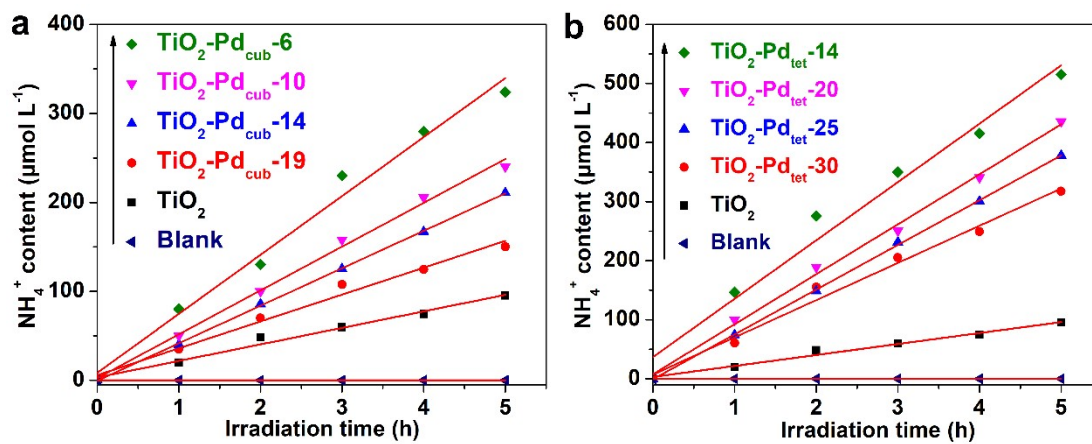

**Fig. S6** Time course of photocatalytic N<sub>2</sub> fixation under UV light irradiation with (a) TiO<sub>2</sub>-Pd<sub>cub</sub> and (b) TiO<sub>2</sub>-Pd<sub>tet</sub> samples as catalysts.

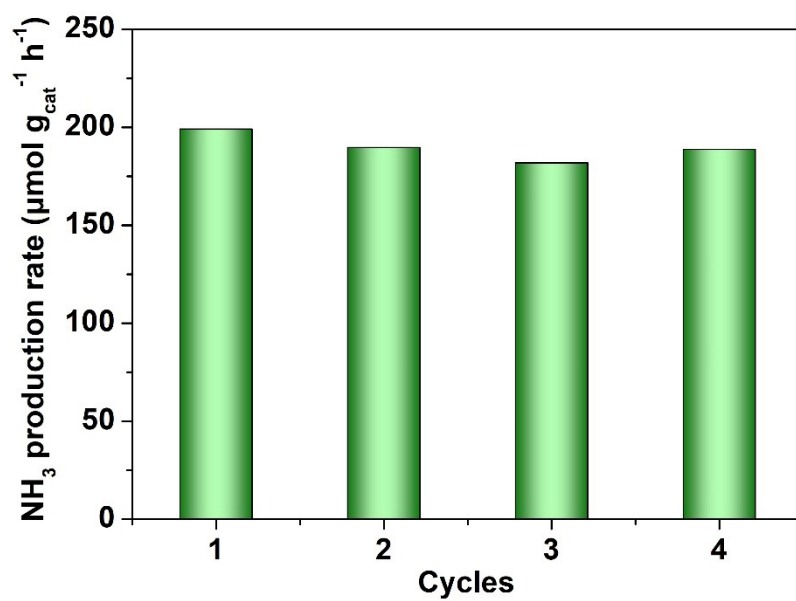

**Fig. S7** Cycling tests of photocatalytic  $\text{NH}_3$  production over  $\text{TiO}_2\text{-Pd}_{\text{tet}}\text{-14}$ .

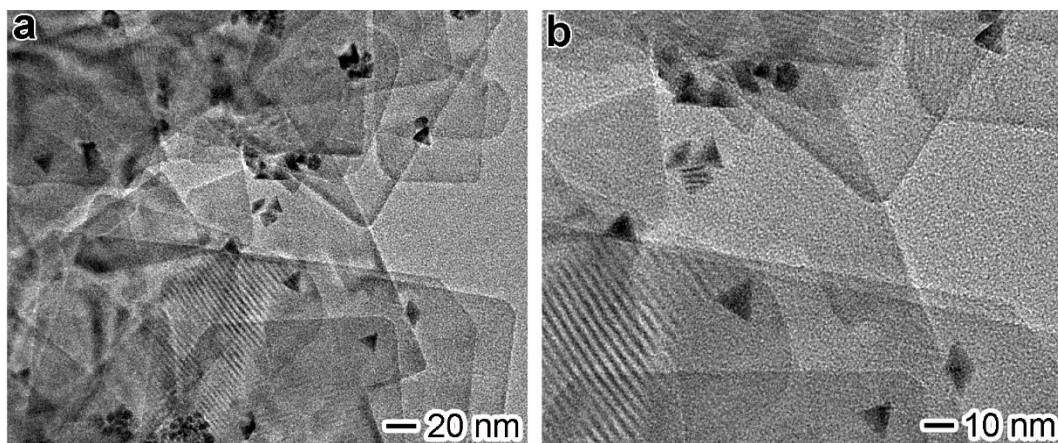

**Fig. S8** TEM images of TiO<sub>2</sub>-Pd<sub>tet</sub>-14 after the photocatalytic cycles.

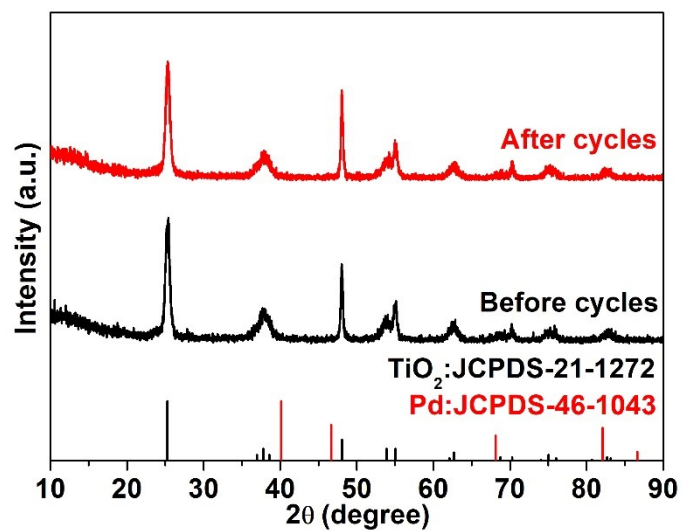

**Fig. S9** XRD patterns of TiO<sub>2</sub>-Pd<sub>tet</sub>-14 before and after the photocatalytic cycles.

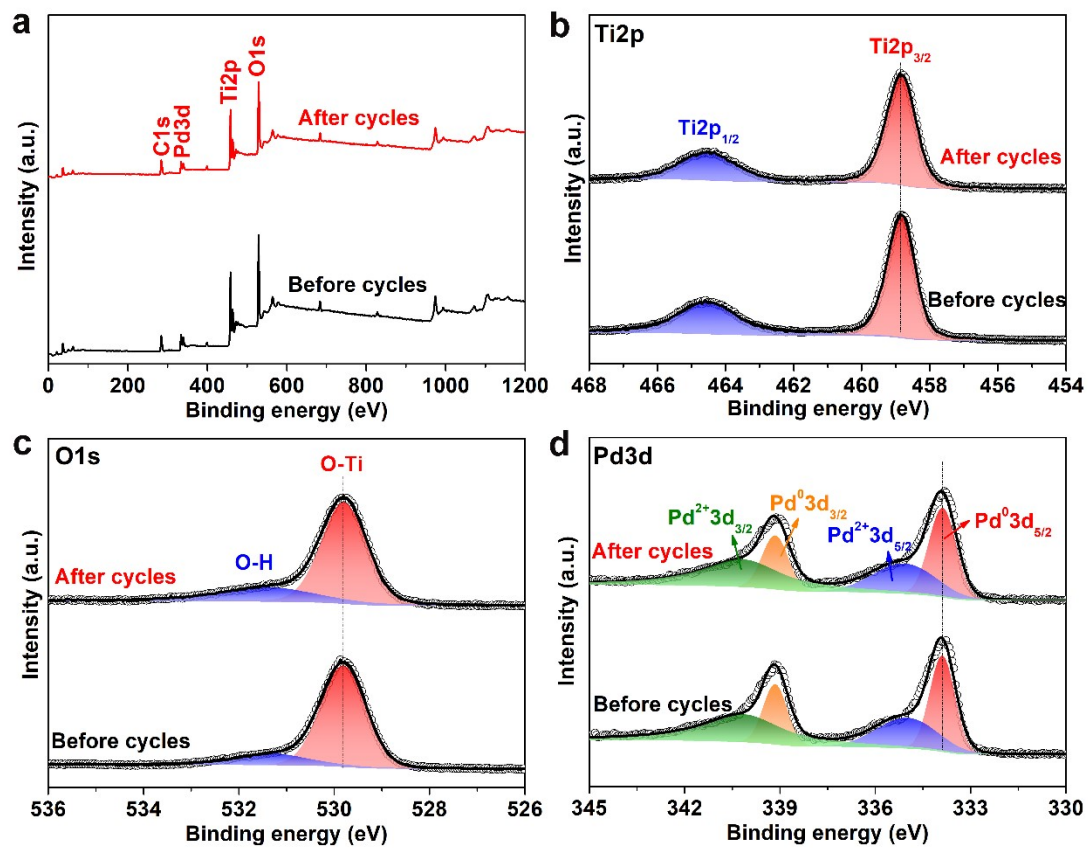

**Fig. S10** XPS spectra of  $\text{TiO}_2\text{-Pd}_{\text{tet}}\text{-14}$  before and after the photocatalytic cycles: (a) survey spectra, (b) Ti2p, (c) O1s and (d) Pd3d.

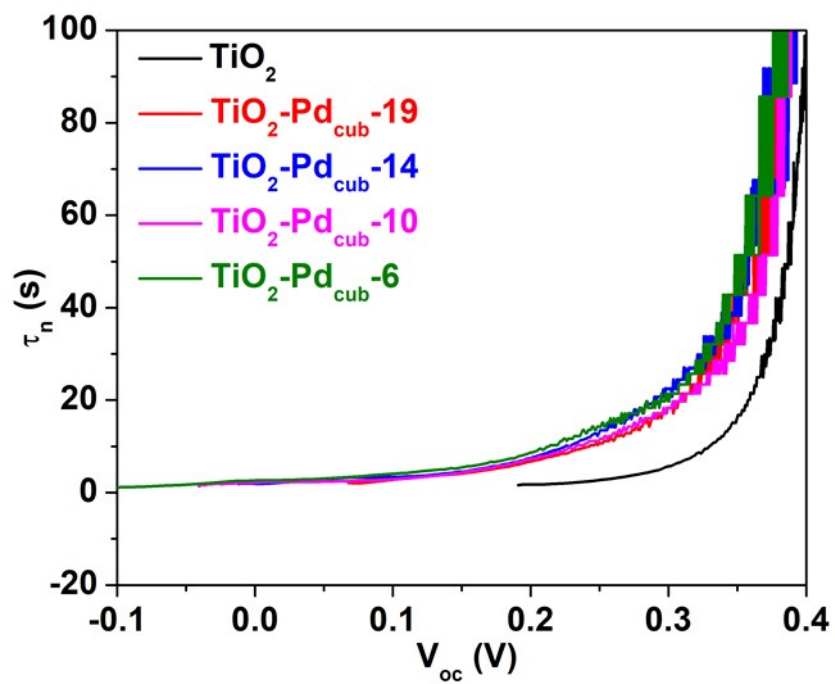

**Fig. S11** Average lifetimes of the photo-generated charge carriers obtained from transient OCVD measurements.

|                                                                                    |                                                                                    |                                                                                    |                                                                                     |                                                                                      |
|------------------------------------------------------------------------------------|------------------------------------------------------------------------------------|------------------------------------------------------------------------------------|-------------------------------------------------------------------------------------|--------------------------------------------------------------------------------------|
| <b>Surface</b>                                                                     |                                                                                    |                                                                                    |                                                                                     |                                                                                      |
| 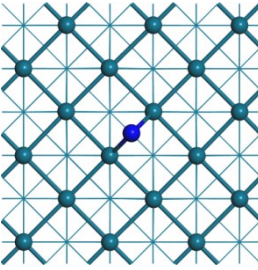  |   |   |                                                                                     |                                                                                      |
| $E_{\text{abs}} = -0.19$                                                           | $E_{\text{abs}} = -0.20$                                                           | $E_{\text{abs}} = -0.27$                                                           |                                                                                     |                                                                                      |
| <b>Edge</b>                                                                        |                                                                                    |                                                                                    |                                                                                     |                                                                                      |
|  |  |  |  |  |
| $E_{\text{abs}} = -0.26$                                                           | $E_{\text{abs}} = -0.18$                                                           | $E_{\text{abs}} = -0.59$                                                           | $E_{\text{abs}} = -0.55$                                                            | $E_{\text{abs}} = -0.72$                                                             |

**Fig. S12** N<sub>2</sub> adsorption configurations and adsorption energies (eV) on surface and edge of Pd nanocubes.



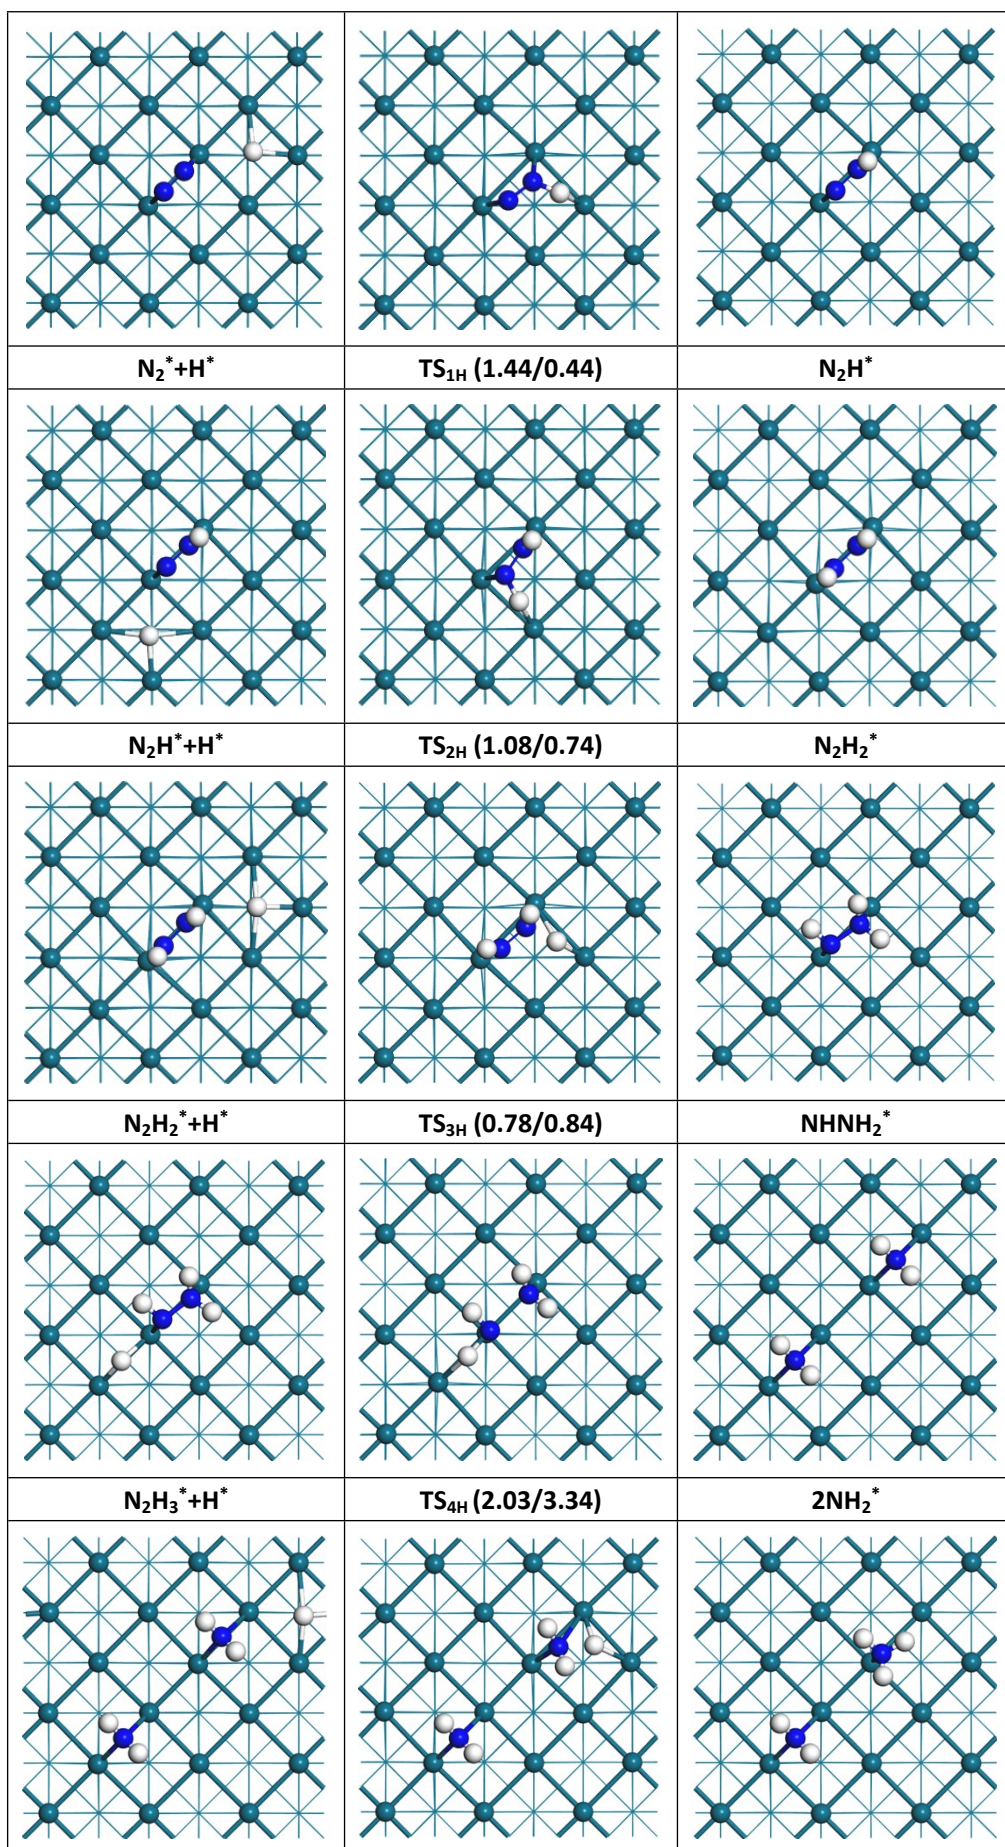

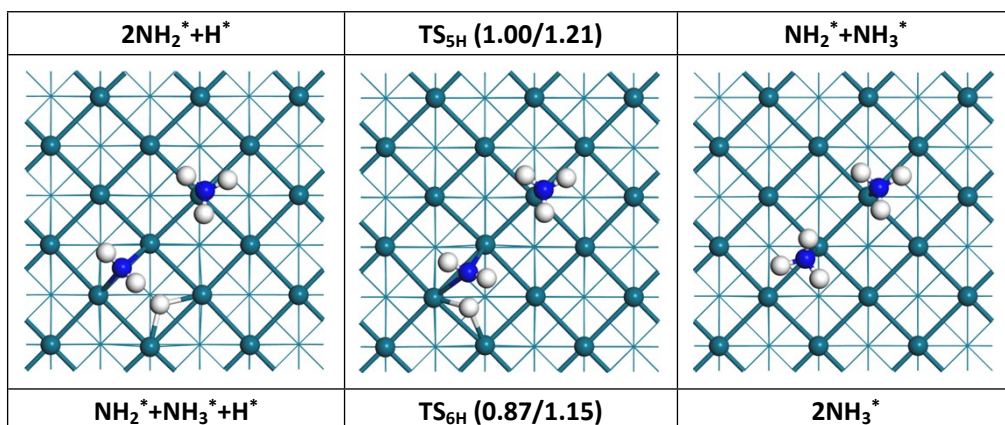

**Fig. S13**  $\text{N}_2$  hydrogenation on (100) surface of Pd nanocubes.

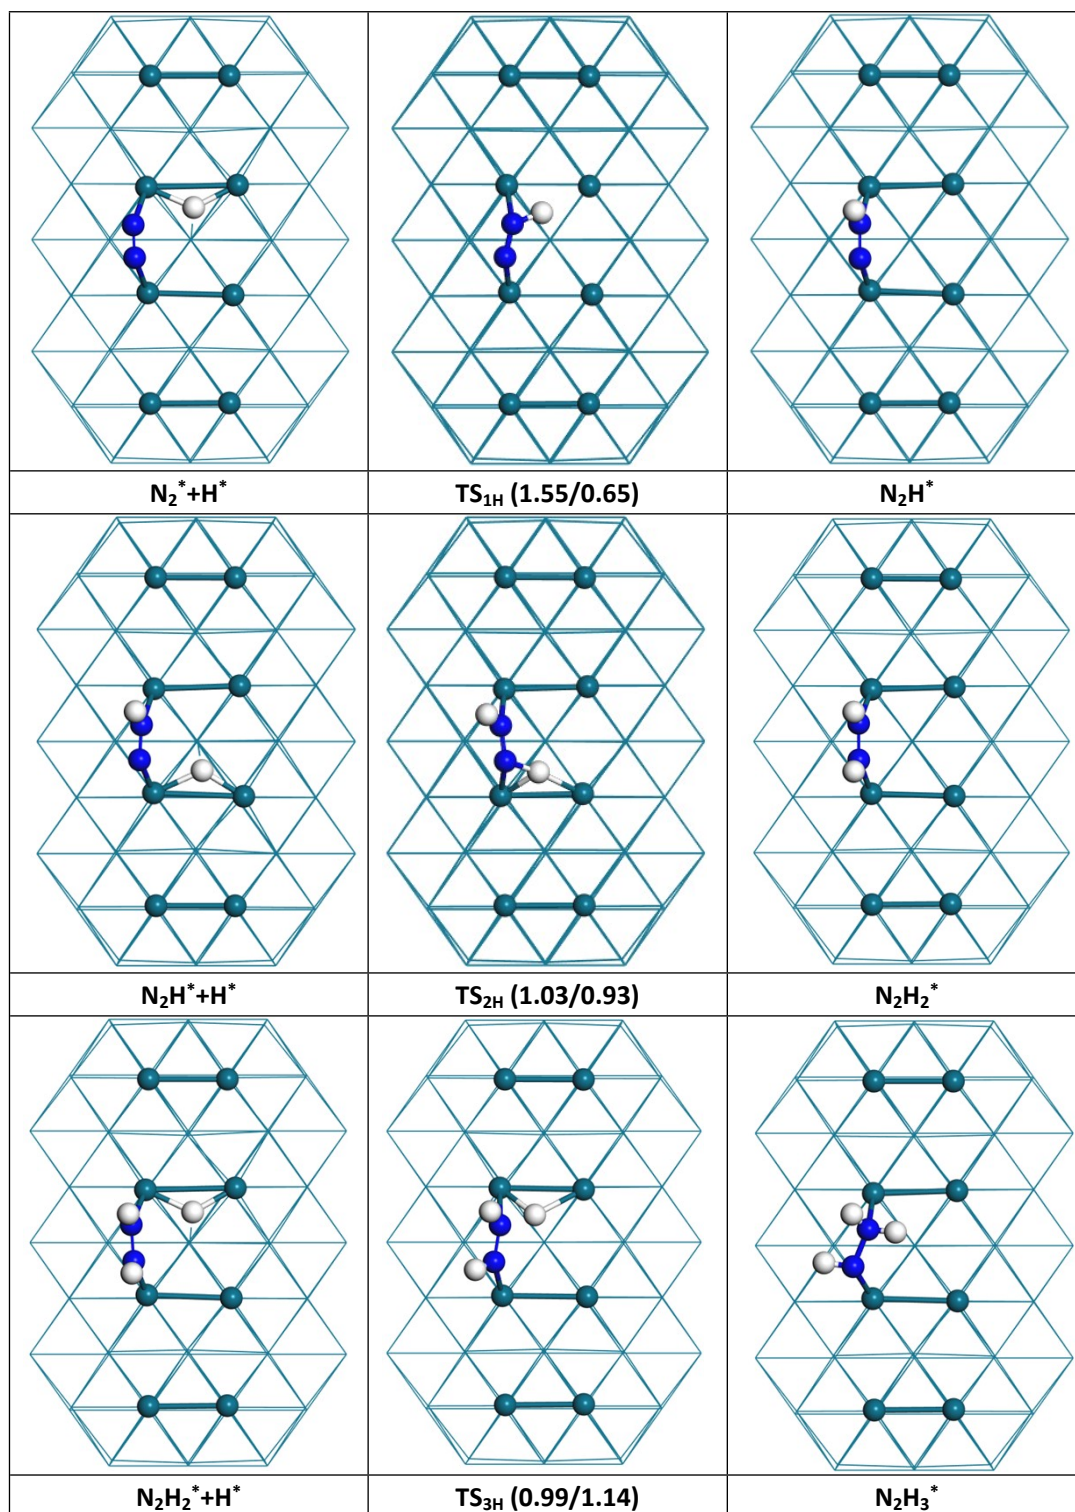

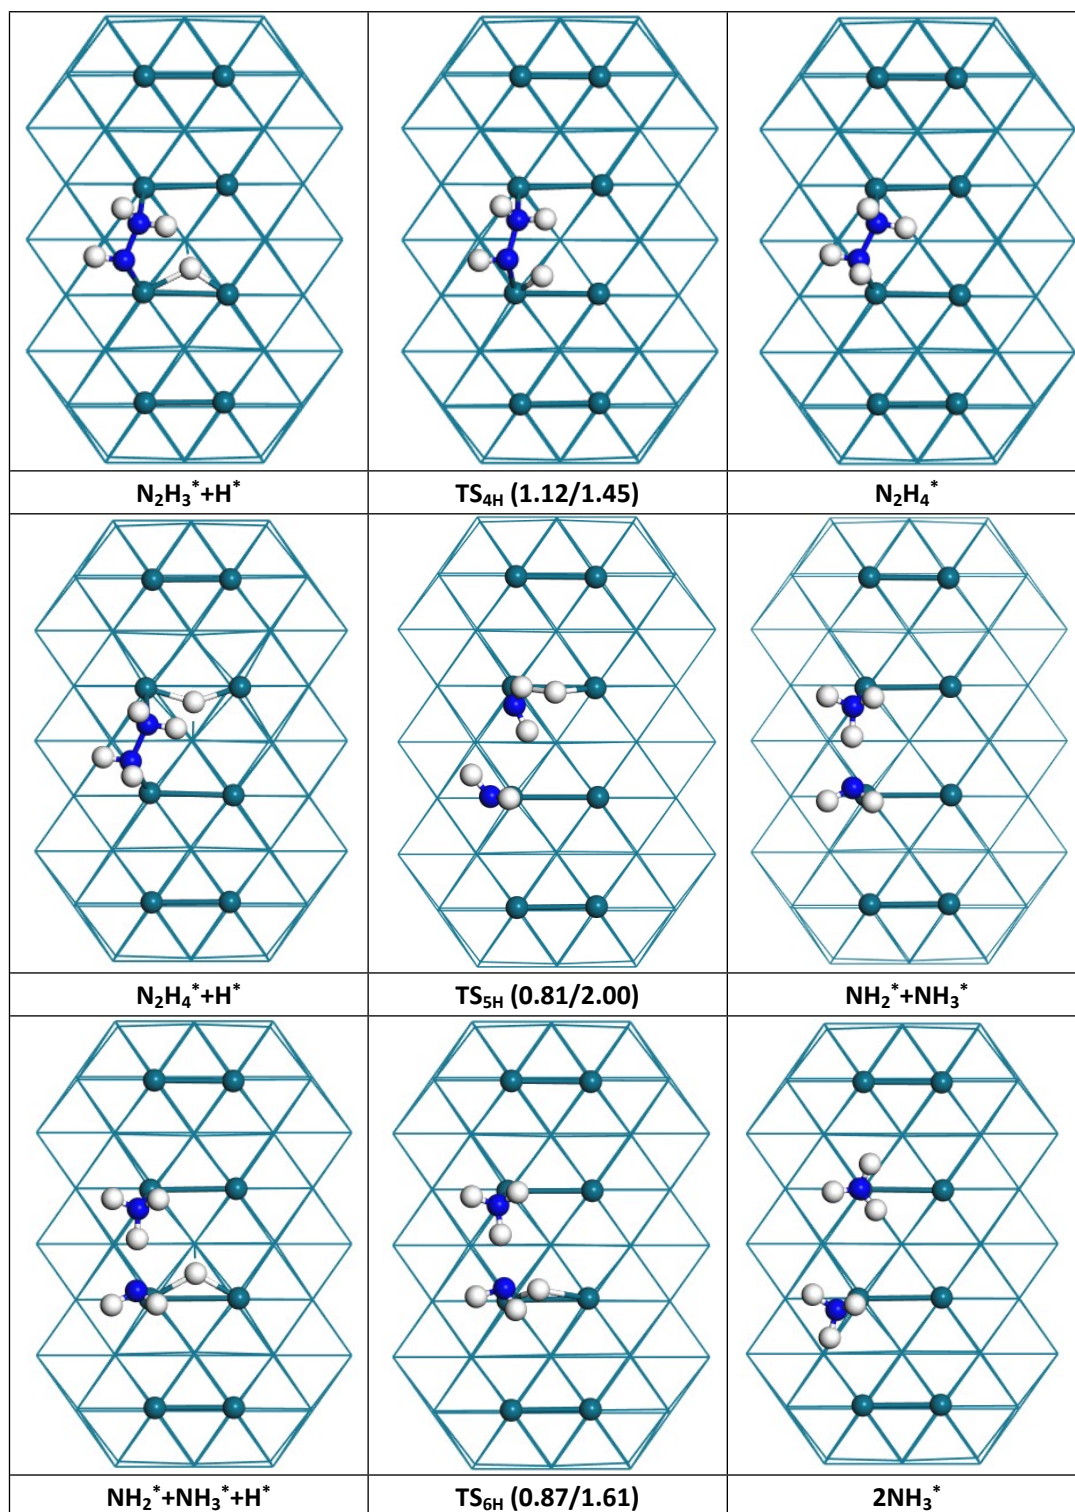

**Fig. S14**  $N_2$  hydrogenation at the edge of Pd nanocubes.

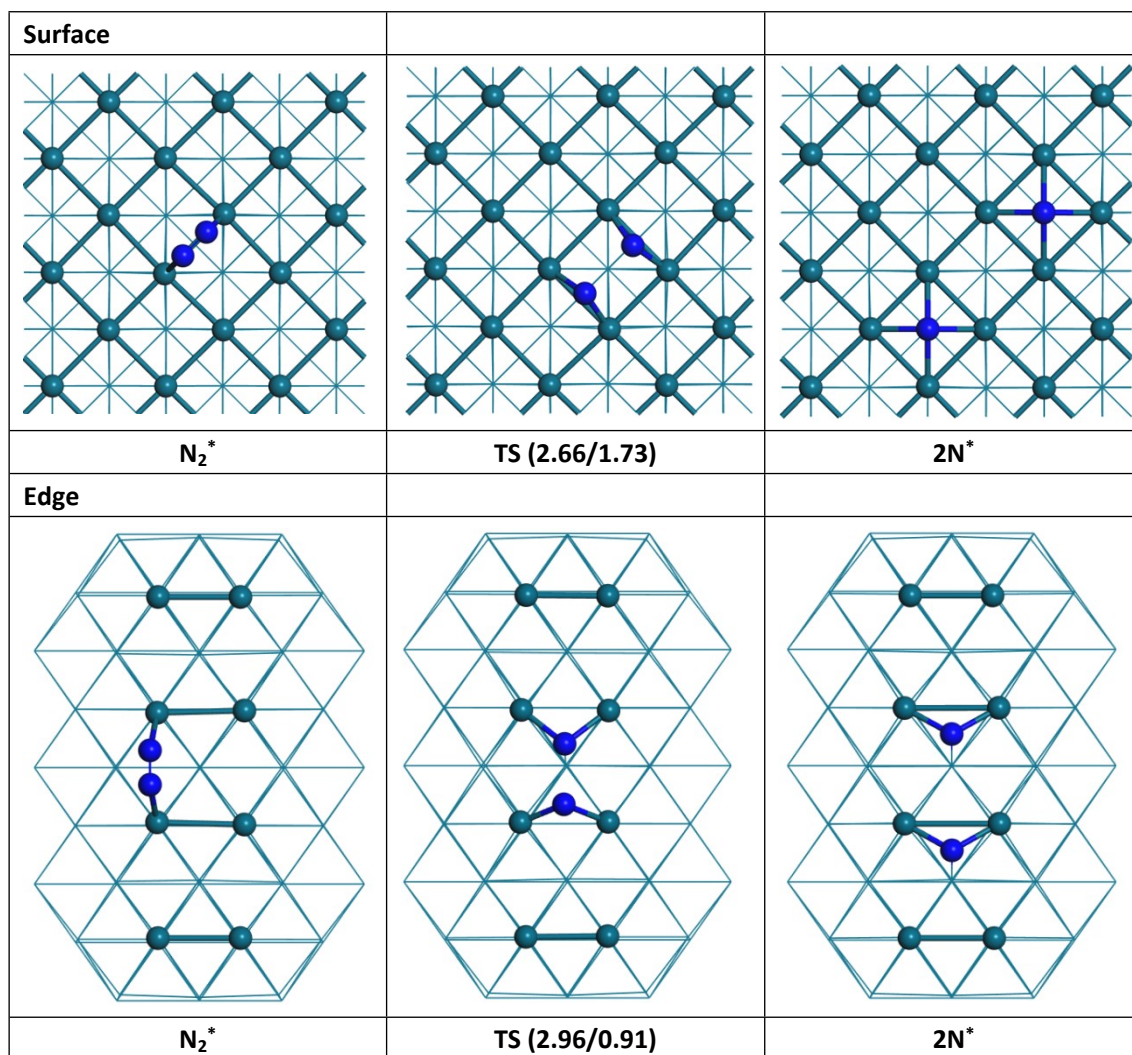

**Fig. S15** N<sub>2</sub> dissociation on the surface and edge of Pd nanocubes.

**Table S1.** Calculation of the number of atoms in Pd nanocubes in different sizes according to the left model.

|                                                                                   |                                           |        |        |       |       |
|-----------------------------------------------------------------------------------|-------------------------------------------|--------|--------|-------|-------|
| 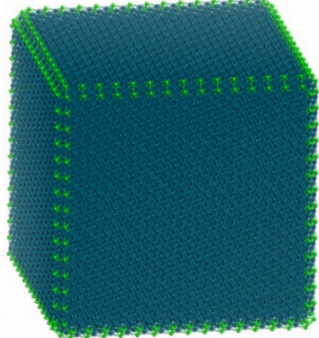 | Average sizes of Pd nanocubes (nm)        | 18.7   | 13.8   | 10.4  | 6.1   |
|                                                                                   | Number of atoms on the edge (C5+C6)       | 1116   | 828    | 588   | 348   |
|                                                                                   | Number of atoms on the surface (C8)       | 20230  | 11560  | 5760  | 1960  |
|                                                                                   | $(C5+C6)/(C8)$                            | 0.055  | 0.072  | 0.102 | 0.178 |
|                                                                                   | $(C5+C6)/(C5+C6+C8)$                      | 0.052  | 0.067  | 0.093 | 0.151 |
|                                                                                   | Total number of atoms                     | 441800 | 186200 | 70000 | 16200 |
|                                                                                   | Ratio of surface atoms to total atoms (%) | 4.6    | 6.2    | 8.2   | 12.1  |
|                                                                                   | Loading amounts of Pd (wt.%)              | 9.1    | 6.7    | 5.0   | 3.0   |

C5, C6, C8 indicate that the atomic coordination number is 5, 6, 8, respectively. C5 and C6 are shown in green. C8 is shown in dark blue. Note that only 5 facets of Pd nanocube were involved due to the contact of one (100) surface with TiO<sub>2</sub>.

**Table S2.** Calculation of the number of atoms in Pd nanotetrahedrons in different sizes according to the left model.

|                                                                                   |                                           |        |        |       |       |
|-----------------------------------------------------------------------------------|-------------------------------------------|--------|--------|-------|-------|
| 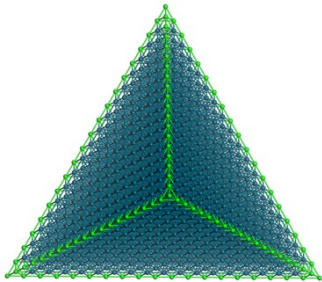 | Average sizes of Pd nanotetrahedrons (nm) | 30.4   | 24.7   | 20.2  | 14.0  |
|                                                                                   | Number of atoms on the edge (C3+C6)       | 652    | 532    | 436   | 298   |
|                                                                                   | Number of atoms on the surface (C9)       | 17334  | 11484  | 7668  | 3528  |
|                                                                                   | $(C3+C6)/(C9)$                            | 0.038  | 0.046  | 0.057 | 0.084 |
|                                                                                   | $(C3+C6)/(C3+C6+C9)$                      | 0.036  | 0.044  | 0.054 | 0.078 |
|                                                                                   | Total number of atoms                     | 227920 | 125580 | 70300 | 23426 |
|                                                                                   | Ratio of surface atoms to total atoms (%) | 7.6    | 9.1    | 10.9  | 15.1  |
|                                                                                   | Loading amounts of Pd (wt.%)              | 5.0    | 4.3    | 3.4   | 2.4   |

C3, C6, C9 indicate that the atomic coordination number is 3, 6, 9, respectively. C3 and C6 are shown in green. C9 is shown in dark blue. Note that only 3 facets of Pd nanotetrahedron were involved due to the contact of one (111) surface with TiO<sub>2</sub>.

## References

- S1 X. Han, Q. Kuang, M. Jin, Z. Xie and L. Zheng, *J. Am. Chem. Soc.*, 2009, **131**, 3152-3153.
